# Supplementary material for: Lycopene ameliorates islet function and down-regulates the TLR4/MyD88/NF-κB pathway in diabetic mice and Min6 cells
Source: Royal Society of Chemistry journal article supplement (doi:10.1039/d3fo00559c), 2023-01-01
Supplement: d3fo00559c1.xlsx [file d3fo00559c1.xlsx]

## Sheet: Sheet1
	HFD
	Components	gm%/kcal%
	Protein	24/20
	Fat	24/45
	Carbohydrate	41/35
	Microelement	11/0
